# Supplementary material
Source: PubMed Central journal article supplement (PMC4056860)
Supplement: am501376n_si_001.pdf [file am501376n_si_001.pdf]

## Supporting Information

*for*

### Effect of Pore Structure of Macroporous Poly(Lactide-co-Glycolide) Scaffolds on the *In Vivo* Enrichment of Dendritic Cells

Jaeyun Kim,<sup>†,‡, ||</sup> Weiwei Aileen Li,<sup>†, ||</sup> Warren Sands,<sup>†, §</sup> David J. Mooney<sup>\*, †</sup>

<sup>†</sup>School of Engineering and Applied Sciences and Wyss Institute for Biologically Inspired Engineering, Harvard University, Cambridge, MA 01238, United States

<sup>‡</sup>School of Chemical Engineering, Sungkyunkwan University, Suwon 440-746, Republic of Korea

<sup>§</sup>Northwestern University Feinberg School of Medicine, Chicago, IL 60610, United States

<sup>||</sup> These authors contributed equally to this work

\*Correspondence to Prof. D. J. Mooney; e-mail: mooneyd@seas.harvard.edu

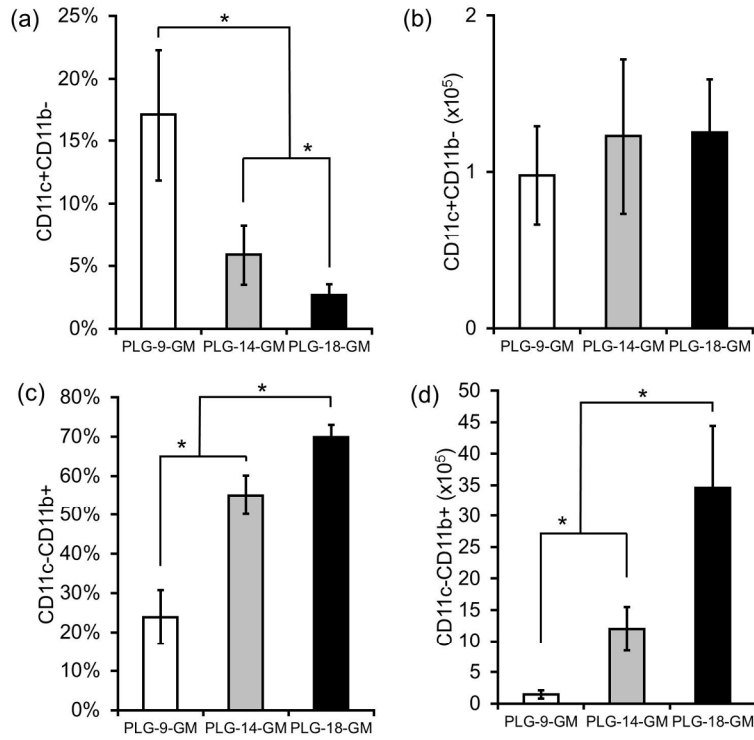

**Figure S1.** (a, c) The percentage and (b, d) the number of CD11c<sup>+</sup>CD11b<sup>-</sup> cells, and CD11c<sup>-</sup>CD11b<sup>+</sup> cells retrieved from the GM-CSF loaded PLG scaffolds at day 7 post implantation, respectively. Values represent mean and s.d. \*represents p<0.05.

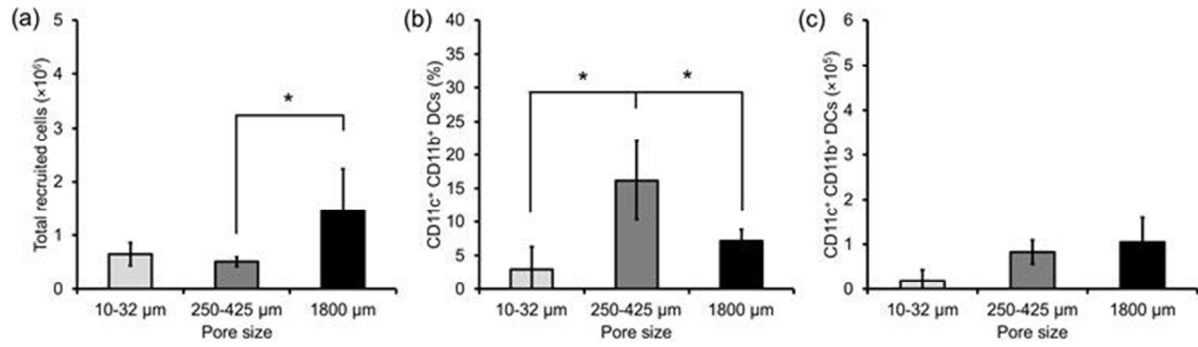

**Figure S2.** (a) The number of total scaffold resident host cells, (b) the percentage and (c) the number of CD11c<sup>+</sup>CD11b<sup>+</sup> DCs at day 7 post implantation of blank PLG scaffolds. The scaffolds were fabricated by solvent casting/particulate leaching. Values represent mean and s.d. \*represents  $p < 0.05$ .
